1 **Updated reference genome sequence and annotation of *Mycobacterium bovis***

2 **AF2122/97**

3

4 Kerri M. Malone<sup>a</sup>, Damien Farrell<sup>a</sup>, Tod P. Stuber<sup>b</sup>, Olga T. Schubert<sup>c\*</sup>, Reudi

5 Aebersold<sup>c</sup>, Suelee Robbe-Austerman<sup>b</sup> and Stephen V. Gordon<sup>a,e,f,g#</sup>

6

7 <sup>a</sup>School of Veterinary Medicine, University College Dublin, Ireland;

8 <sup>b</sup>Diagnostic Bacteriology Laboratory, National Veterinary Services Laboratories,

9 Ames, Iowa, USA;

10 <sup>c</sup>Department of Biology, Institute of Molecular Systems Biology, ETH Zurich, CH-8093,

11 Switzerland;

12 <sup>e</sup>School of Medicine, University College Dublin, Ireland;

13 <sup>f</sup>School of Biomolecular and Biomedical Science, University College Dublin, Ireland;

14 <sup>g</sup>UCD Conway Institute of Biomolecular and Biomedical Research, University College

15 Dublin, Ireland

16 \*Present address: Department of Human Genetics, University of California, Los

17 Angeles, USA

18

19 **Running title**

20 *Mycobacterium bovis* AF2122/97: an update

21

22 #Address correspondence to Stephen V. Gordon, [stephen.gordon@ucd.ie](mailto:stephen.gordon@ucd.ie)

23 **Abstract**

24 We report an update to the reference genome of the bovine tuberculosis bacillus  
25 *Mycobacterium bovis* AF2122/97 generated using an integrative multi-omics  
26 approach. Updates include 42 new CDS, 14 modified annotations, 26 SNP  
27 corrections, and disclosure that the RD900 locus, previously described as absent  
28 from the genome, is in fact present.

29

30 **Text**

31 The *Mycobacterium tuberculosis* complex (MTBC) is a collection of genetically  
32 related mycobacterial species that cause tuberculosis (TB) in human and animal  
33 hosts. *Mycobacterium bovis*, the causative agent of bovine tuberculosis (bTB), is the  
34 most widely studied animal-adapted MTBC member; bTB exacts a tremendous global  
35 economic toll through productivity losses and disease control costs, while zoonotic  
36 transmission of *M. bovis* infection is a threat to human health (Abernethy *et al.*,  
37 2013; De Garine-Wichatitsky *et al.*, 2013; Kazoora *et al.*, 2016; Khattak *et al.*, 2016;  
38 Malama *et al.*, 2014; Muller *et al.*, 2013).

39 *M. bovis* AF2122/97 was the first bovine MTBC strain to be fully sequenced  
40 and provided a reference genome (Garnier *et al.*, 2003). Initial comparisons of the *M.*  
41 *bovis* AF2122/97 genome with that of the human-adapted *M. tuberculosis* H37Rv  
42 reference genome revealed high nucleotide sequence identity (> 99%), no unique  
43 genes *per se* in *M. bovis* AF2122/97 and a number of genomic deletions that led to a  
44 reduced genome size (Garnier *et al.*, 2003). *M. bovis* AF2122/97 continues to serve  
45 as an MTBC reference genome despite last being updated in 2003; by comparison,  
46 the genome annotation of the reference *M. tuberculosis* H37Rv strain is currently on

47 release 27 (Lew *et al.*, 2013). An updated reference *M. bovis* genome will provide an  
48 essential resource for the TB research community and as a basis for comparative  
49 studies into animal- and human-adapted MTBC members.

50 To update the *M. bovis* AF2122/97 genome and annotation, a low-passage  
51 stock taken from the original *M. bovis* AF2122/97 seed stock was re-sequenced and  
52 re-annotated using a combination of DNA-, RNA-sequencing and proteomics data. All  
53 nucleic acid and protein samples were derived from exponentially grown cultures.

54 Short read DNA sequencing libraries were prepared using the Nextera XT  
55 DNA Library Preparation Kit (Illumina®) and sequenced on the MiSeq® system  
56 (Illumina®), generating 250bp paired-end reads that were trimmed using Sickle (Q  
57 >30), with 60X reference coverage (Joshi NA, 2011). For PacBio RS II sequencing,  
58 enzymatically extracted DNA was prepared using large insert library (6kb-8kb) size  
59 selection (van Soolingen *et al.*, 1991). Two SMRT cells were used for an output of  
60 542,585,804 bases, a mean read length of 8,141, and 86X reference coverage. DNA  
61 sequencing datasets were analysed using a combination of *de novo* assembly (short  
62 reads, SOAPdenovo (Xie *et al.*, 2014); long reads, Canu (Koren S, 2016)) and  
63 nucleotide variant identification methods (short reads, Stampy, SAMtools and  
64 VCFtools (Li, 2011; Li *et al.*, 2009; Lunter and Goodson, 2011); long reads, Pilon  
65 (Walker *et al.*, 2014); MUMmer (Kurtz *et al.*, 2004)). This allowed for the update of  
66 the genome nucleotide sequence and the identification of genomic regions that  
67 were misassembled, or missed entirely, in the original sequencing project. Re-  
68 annotation of the *M. bovis* AF2122/97 genome was achieved by automatic  
69 annotation transfer from *M. tuberculosis* H37Rv (Version 27) (Otto *et al.*, 2011) and a

70 proteogenomic analysis using both *M. bovis* AF2122/97 shotgun MS/MS, SWATH MS  
71 datasets and *M. tuberculosis* H37Rv SWATH MS datasets (Schubert *et al.*, 2013).

72 Overall, 26 single nucleotide polymorphisms were identified. Strikingly, the  
73 large sequence polymorphism RD900, originally described as deleted from *M. bovis*  
74 2122/97 (Bentley *et al.*, 2012), was found to be present; recombination between  
75 repeat structures flanking the RD900 locus in clones used for the original shotgun  
76 sequencing genome project may have led to loss of RD900. Furthermore, 42 novel  
77 coding sequences were identified while 14 existing annotations were modified.

78

79 **Nucleotide sequence accession number(s):** This Whole Genome Shotgun project  
80 had been deposited in DDBJ/ENA/Genbank under the accession no. LT708304.  
81 SWATH MS data can be found on PeptideAtlas (<http://www.peptideatlas.org>) under  
82 identifier: PASS00932.

83

84 **Acknowledgements:**

85 The work was supported by funding from the Department for Agriculture, Food and  
86 the Marine (MycobactDiagnosis 11/RD/EMIDA/1), Science Foundation Ireland  
87 (08/IN.1/B2038), SystemsX.ch (through the project TbX) and a research grant from  
88 Institut Mérieux. We would like to thank Dr. Gerard Cagney (UCD School of  
89 Biomolecular and Biomedical Science) and Dr. Kieran Wynne (UCD Conway  
90 Proteomics Core) for shotgun mass spectrometric analysis of *M. bovis* samples.

91 **References:**

- 92 ABERNETHY, D. A., UPTON, P., HIGGINS, I. M., MCGRATH, G., GOODCHILD, A. V.,  
93 ROLFE, S. J., BROUGHAN, J. M., DOWNS, S. H., CLIFTON-HADLEY, R., MENZIES,  
94 F. D., DE LA RUA-DOMENECH, R., BLISSITT, M. J., DUIGNAN, A. & MORE, S. J.  
95 2013. Bovine tuberculosis trends in the UK and the Republic of Ireland, 1995-  
96 2010. *Vet Rec*, 172, 312.
- 97 BENTLEY, S. D., COMAS, I., BRYANT, J. M., WALKER, D., SMITH, N. H., HARRIS, S. R.,  
98 THURSTON, S., GAGNEUX, S., WOOD, J., ANTONIO, M., QUAIL, M. A., GEHRE,  
99 F., ADEGBOLA, R. A., PARKHILL, J. & DE JONG, B. C. 2012. The genome of  
100 *Mycobacterium africanum* West African 2 reveals a lineage-specific locus and  
101 genome erosion common to the *M. tuberculosis* complex. *PLoS Negl Trop Dis*,  
102 6, e1552.
- 103 DE GARINE-WICHATITSKY, M., CARON, A., KOCK, R., TSCHOPP, R., MUNYEME, M.,  
104 HOFMEYR, M. & MICHEL, A. 2013. A review of bovine tuberculosis at the  
105 wildlife-livestock-human interface in sub-Saharan Africa. *Epidemiol Infect*,  
106 141, 1342-56.
- 107 GARNIER, T., EIGLMEIER, K., CAMUS, J. C., MEDINA, N., MANSOOR, H., PRYOR, M.,  
108 DUTHOY, S., GRONDIN, S., LACROIX, C., MONSEMPE, C., SIMON, S., HARRIS,  
109 B., ATKIN, R., DOGGETT, J., MAYES, R., KEATING, L., WHEELER, P. R.,  
110 PARKHILL, J., BARRELL, B. G., COLE, S. T., GORDON, S. V. & HEWINSON, R. G.  
111 2003. The complete genome sequence of *Mycobacterium bovis*. *Proc Natl*  
112 *Acad Sci U S A*, 100, 7877-82.
- 113 JOSHI NA, F. J. 2011. *Sickle: A sliding-window, adaptive, quality-based trimming tool*  
114 *for FastQ files* [Online]. Available: <https://github.com/najoshi/sickle>  
115 [Accessed].
- 116 KAZOORA, H. B., MAJALIJA, S., KIWANUKA, N. & KANEENE, J. B. 2016. Knowledge,  
117 Attitudes and Practices Regarding Risk to Human Infection due to  
118 *Mycobacterium bovis* among Cattle Farming Communities in Western  
119 Uganda. *Zoonoses Public Health*.
- 120 KHATTAK, I., MUSHTAQ, M. H., AHMAD, M. U., KHAN, M. S. & HAIDER, J. 2016.  
121 Zoonotic tuberculosis in occupationally exposed groups in Pakistan. *Occup*  
122 *Med (Lond)*.
- 123 KOREN S, W. B., BERLIN K, MILLER JR, PHILLIPPY AM 2016. Canu: scalable and  
124 accurate long-read assembly via adaptive k-mer weighting and repeat  
125 separation. *bioRxiv*.
- 126 KURTZ, S., PHILLIPPY, A., DELCHER, A. L., SMOOT, M., SHUMWAY, M., ANTONESCU,  
127 C. & SALZBERG, S. L. 2004. Versatile and open software for comparing large  
128 genomes. *Genome Biology*, 5.
- 129 LEW, J. M., MAO, C., SHUKLA, M., WARREN, A., WILL, R., KUZNETSOV, D., XENARIOS,  
130 I., ROBERTSON, B. D., GORDON, S. V., SCHNAPPINGER, D., COLE, S. T. &  
131 SOBRAL, B. 2013. Database resources for the tuberculosis community.  
132 *Tuberculosis (Edinb)*, 93, 12-7.
- 133 LI, H. 2011. A statistical framework for SNP calling, mutation discovery, association  
134 mapping and population genetical parameter estimation from sequencing  
135 data. *Bioinformatics*, 27, 2987-93.
- 136 LI, H., HANDSAKER, B., WYSOKER, A., FENNEL, T., RUAN, J., HOMER, N., MARTH, G.,  
137 ABECASIS, G., DURBIN, R. & GENOME PROJECT DATA PROCESSING, S. 2009.

- 138           The Sequence Alignment/Map format and SAMtools. *Bioinformatics*, 25,  
139           2078-9.
- 140 LUNTER, G. & GOODSON, M. 2011. Stampy: a statistical algorithm for sensitive and  
141           fast mapping of Illumina sequence reads. *Genome Res*, 21, 936-9.
- 142 MALAMA, S., MUMA, J., MUNYEME, M., MBULO, G., MUWONGE, A., SHAMPUTA, I.  
143           C., DJONNE, B., GODFROID, J. & JOHANSEN, T. B. 2014. Isolation and  
144           molecular characterization of Mycobacterium tuberculosis from humans and  
145           cattle in Namwala District, Zambia. *Ecohealth*, 11, 564-70.
- 146 MULLER, B., DURR, S., ALONSO, S., HATTENDORF, J., LAISSE, C. J., PARSONS, S. D.,  
147           VAN HELDEN, P. D. & ZINSSTAG, J. 2013. Zoonotic Mycobacterium bovis-  
148           induced tuberculosis in humans. *Emerg Infect Dis*, 19, 899-908.
- 149 OTTO, T. D., DILLON, G. P., DEGRAVE, W. S. & BERRIMAN, M. 2011. RATT: Rapid  
150           Annotation Transfer Tool. *Nucleic Acids Res*, 39, e57.
- 151 SCHUBERT, O. T., MOURITSEN, J., LUDWIG, C., ROST, H. L., ROSENBERGER, G.,  
152           ARTHUR, P. K., CLAASSEN, M., CAMPBELL, D. S., SUN, Z., FARRAH, T.,  
153           GENGENBACHER, M., MAIOLICA, A., KAUFMANN, S. H., MORITZ, R. L. &  
154           AEBERSOLD, R. 2013. The Mtb proteome library: a resource of assays to  
155           quantify the complete proteome of Mycobacterium tuberculosis. *Cell Host*  
156           *Microbe*, 13, 602-12.
- 157 VAN SOOLINGEN, D., HERMANS, P. W., DE HAAS, P. E., SOLL, D. R. & VAN EMBDEN, J.  
158           D. 1991. Occurrence and stability of insertion sequences in Mycobacterium  
159           tuberculosis complex strains: evaluation of an insertion sequence-dependent  
160           DNA polymorphism as a tool in the epidemiology of tuberculosis. *J Clin*  
161           *Microbiol*, 29, 2578-86.
- 162 WALKER, B. J., ABEEL, T., SHEA, T., PRIEST, M., ABOUELLIEL, A., SAKTHIKUMAR, S.,  
163           CUOMO, C. A., ZENG, Q. D., WORTMAN, J., YOUNG, S. K. & EARL, A. M. 2014.  
164           Pilon: An Integrated Tool for Comprehensive Microbial Variant Detection and  
165           Genome Assembly Improvement. *Plos One*, 9.
- 166 XIE, Y., WU, G., TANG, J., LUO, R., PATTERSON, J., LIU, S., HUANG, W., HE, G., GU, S.,  
167           LI, S., ZHOU, X., LAM, T. W., LI, Y., XU, X., WONG, G. K. & WANG, J. 2014.  
168           SOAPdenovo-Trans: de novo transcriptome assembly with short RNA-Seq  
169           reads. *Bioinformatics*, 30, 1660-6.
- 170
